# Supplementary material for: Pre-Diagnostic Circulating Resistin Concentrations Are Not Associated with Colorectal Cancer Risk in the European Prospective Investigation into Cancer and Nutrition Study
Source: MDPI journal article supplement (doi:10.3390/cancers14225499), 2022-11-09
Supplement: s1 [file s1]

# Title: Pre-Diagnostic Circulating Resistin Concentrations Are Not Associated with Colorectal Cancer Risk in the European Prospective Investigation into Cancer and Nutrition Study

## Supplementary Materials

Figure S1: Association of pre-diagnostic resistin concentrations and risk of CRC.

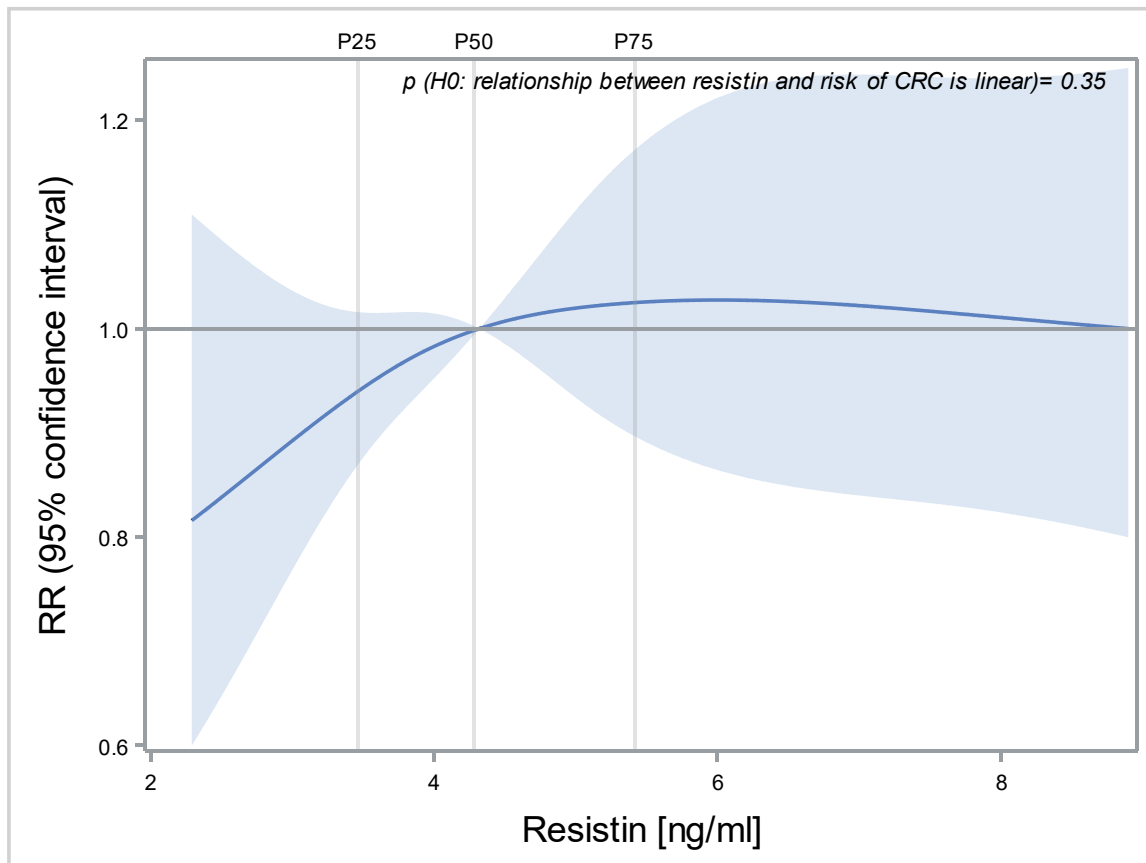

Association of circulating resistin concentrations with colorectal cancer in a spline regression model based on a conditional logistic regression with restricted cubic splines plotted with four knots at the 5th, 35th, 65th, and 95th percentiles of resistin concentration distribution. Solid lines indicate the relative risk, and shaded blue areas indicate the 95% confidence intervals. The reference of the spline plots is the median of resistin concentrations (4.32 ng/ml). Grey vertical lines indicate the 25<sup>th</sup> (P25), 50<sup>th</sup> (P50), and 75<sup>th</sup> (P75) percentiles of resistin concentrations.

All models were conditioned on matching factors including age, sex, study center, time of the day at blood collection, and fasting status; women were further matched by menopausal status, phase of the menstrual cycle at blood collection, and use of oral contraceptives at blood collection; postmenopausal women were matched by hormone replacement therapy use. P-values for non-linearity were derived from a likelihood ratio (LR) test to compare full multivariable-adjusted conditional logistic regression models including both the linear and cubic spline term and reduced multivariable-adjusted conditional logistic regression models with only the linear term.

**Table S1.** Characteristics of 1293 colorectal cancer cases and the 1293 matched controls in the nested case-control study, European Prospective Investigation into Cancer and Nutrition, 1992–2005

|                                                                       | Colorectal cancer cases<br>(n=1293) | Matched controls<br>(n=1293) |
|-----------------------------------------------------------------------|-------------------------------------|------------------------------|
| Colorectal cancer subtype, n (%)                                      |                                     |                              |
| Colon cancer                                                          | 757 (58.6)                          | —                            |
| Rectal cancer                                                         | 475 (36.7)                          | —                            |
| Unspecified                                                           | 61 (4.7)                            | —                            |
| Age at blood collection, years, mean (SD) <sup>a</sup>                | 58.1 (7.0)                          | 58.1 (7.0)                   |
| Women, n (%) <sup>a</sup>                                             | 681 (52.7)                          | 681 (52.7)                   |
| Postmenopausal women, baseline, n (%) <sup>a</sup>                    | 505 (39.1)                          | 515 (39.8)                   |
| Fasting (>6 h), n (%) <sup>a</sup>                                    | 350 (27.1)                          | 350 (27.1)                   |
| BMI, kg/m <sup>2</sup> , mean (SD)                                    | 26.7 (4.1)                          | 26.3 (3.8)                   |
| Waist circumference, cm, mean (SD) <sup>b</sup>                       | 90.4 (12.8)                         | 88.5 (12.3)                  |
| Diagnosed diabetes at baseline (self-reported or HbA1C ≥ 6.5%), n (%) | 106 (8.2)                           | 64 (5.0)                     |
| Current smoker, n (%)                                                 | 328 (25.4)                          | 323 (25.0)                   |
| University or higher education level, n (%)                           | 221 (17.1)                          | 229 (17.7)                   |
| Physically active (moderately active, or active), sex-specific n(%)   | 262 (20.3)                          | 319 (24.7)                   |
| Alcohol abstainers (under 0.3 g/day), n(%)                            | 117 (13.7)                          | 189 (14.6)                   |
| Alcohol consumption, g/day, median (Q1–Q3) <sup>b</sup>               | 8.7 (1.5 - 24.1)                    | 8.0 (1.7 - 21.1)             |
| Energy intake, Kcal/d, median (Q1–Q3) <sup>b</sup>                    | 2074 (1682 - 2498)                  | 2029 (1639 - 2464)           |
| Red meat, g/day, median (Q1–Q3) <sup>b</sup>                          | 48.1 (24.6 - 76.2)                  | 46.5 (24.8 - 74.1)           |
| Processed meat, g/day, median (Q1–Q3) <sup>b</sup>                    | 25.7 (13.7 - 44.5)                  | 25.2 (13.3 - 44.4)           |
| Dietary fiber, g/day, median (Q1–Q3) <sup>b</sup>                     | 21.9 (17.5 - 27.3)                  | 22.9 (18.0 - 27.7)           |
| Fruit intake, g/day, median (Q1–Q3) <sup>b</sup>                      | 184.2 (100.3 - 290.5)               | 190.4 (105.4 - 311.2)        |
| Vegetable intake, g/day, median (Q1–Q3) <sup>b</sup>                  | 155.8 (101.7 - 234.0)               | 156.8 (100.5 - 240.1)        |
| Dairy intake, g/day, median (Q1–Q3) <sup>b</sup>                      | 281.5 (150.0 - 458.3)               | 298.9 (168.2 - 468.4)        |
| Fish and shellfish, g/day, median (Q1–Q3) <sup>b</sup>                | 28.2 (15.2 - 50.3)                  | 29.7 (14.8 - 51.6)           |
| Resistin concentrations, ng/ml, mean (SD) <sup>b</sup>                | 4.7 (2.0)                           | 4.7 (2.2)                    |
| Adiponectin, µg/ml, median (Q1–Q3) <sup>b</sup>                       | 6.6 (4.7–9.2)                       | 7.2 (5.2–9.6)                |
| HMW Adiponectin, µg/ml (Q1–Q3) <sup>b</sup>                           | 3.4 (2.1–5.1)                       | 3.7 (2.4–5.4)                |
| Leptin, ng/ml (Q1–Q3) <sup>b</sup>                                    | 8.9 (4.6–17.5)                      | 7.6 (3.7–16.8)               |
| Soluble leptin receptor, ng/ml, mean (SD) <sup>b</sup>                | 21.4 (7.2)                          | 22.8 (10.7)                  |
| Reactive oxygen metabolites, Carratelli units, mean (SD) <sup>b</sup> | 399.5 (74.8)                        | 384.9 (69.6)                 |
| CRP-hs, mg/L, median (Q1–Q3) <sup>b</sup>                             | 2.7 (1.0 - 4.8)                     | 2.2 (0.9 - 4.4)              |
| C-peptide, ng/ml, mean (SD) <sup>b</sup>                              | 4.8 (2.7)                           | 4.7 (2.8)                    |
| HDL-C, mmol/l, median (Q1–Q3) <sup>b</sup>                            | 1.4 (1.2–1.7)                       | 1.4 (1.2–1.8)                |
| HbA1c, NGSP standardisation, mean (SD) <sup>b</sup>                   | 5.9 (0.8)                           | 5.8 (0.6)                    |

a. Matching variable. b. Among users only.

Abbreviations: Q1–Q3, 25th–75th percentiles; SD, standard deviation; BMI, Body mass index; HMW, high-molecular weight; ROM, Reactive oxygen metabolites; HDL-C, High-density lipoprotein cholesterol (HDL-C); hsCRP, High-sensitivity C-reactive protein; HbA1c, glycated hemoglobin A1c.

Table S2. Association of resistin concentrations and risk of colorectal cancer in subgroups analyses.

|                                                                                                        |                              | Quartile form |                    |                    |                    |                      | Continuous form                               |         |
|--------------------------------------------------------------------------------------------------------|------------------------------|---------------|--------------------|--------------------|--------------------|----------------------|-----------------------------------------------|---------|
|                                                                                                        |                              | Q1            | Q2                 | Q3                 | Q4                 | p trend <sup>a</sup> | Doubling resistin concentrations <sup>b</sup> | p value |
| Resistin quartile ranges (ng/ml)                                                                       |                              | ≤3.47         | 3.47 < to ≤4.28    | 4.28 < to ≤5.42    | 5.42 < to ≤34.41   |                      |                                               |         |
| By BMI <sup>c d</sup>                                                                                  |                              |               |                    |                    |                    |                      |                                               |         |
|                                                                                                        | BMI≥25                       |               |                    |                    |                    |                      |                                               |         |
|                                                                                                        | No. cases/ controls          | 197/198       | 213/206            | 206/203            | 218/192            |                      | 834/799                                       |         |
|                                                                                                        | RR (95%CI)                   | ref           | 1.05 (0.79 - 1.41) | 1.03 (0.77 - 1.38) | 1.19 (0.89 - 1.61) | 0.65                 | 1.17 (0.95 - 1.44)                            | 0.13    |
|                                                                                                        | BMI<25                       |               |                    |                    |                    |                      |                                               |         |
|                                                                                                        | No. cases/ controls          | 100/126       | 104/119            | 142/118            | 113/131            |                      | 459/494                                       |         |
|                                                                                                        | RR (95%CI)                   | ref           | 1.08 (0.73 - 1.61) | 1.56 (1.05 - 2.30) | 1.13 (0.76 - 1.70) | 0.11                 | 1.06 (0.81 - 1.39)                            | 0.68    |
| By hsCRP <sup>c e</sup>                                                                                |                              |               |                    |                    |                    |                      |                                               |         |
|                                                                                                        | CRP ≥3mg/l                   |               |                    |                    |                    |                      |                                               |         |
|                                                                                                        | No. cases/ controls          | 71/63         | 80/59              | 115/74             | 124/89             |                      | 390/285                                       |         |
|                                                                                                        | RR (95%CI)                   | ref           | 1.16 (0.68 - 1.98) | 1.47 (0.89 - 2.44) | 1.45 (0.87 - 2.41) | 0.38                 | 1.31 (0.94 - 1.81)                            | 0.11    |
|                                                                                                        | CRP <3mg/l                   |               |                    |                    |                    |                      |                                               |         |
|                                                                                                        | No. cases/ controls          | 134/122       | 125/124            | 122/106            | 97/90              |                      | 478/442                                       |         |
|                                                                                                        | RR (95%CI)                   | ref           | 0.94 (0.64 - 1.37) | 1.01 (0.68 - 1.50) | 0.94 (0.62 - 1.43) | 0.97                 | 0.94 (0.70 - 1.27)                            | 0.70    |
| By length of follow-up <sup>f</sup>                                                                    |                              |               |                    |                    |                    |                      |                                               |         |
|                                                                                                        | ≤ 2 years                    |               |                    |                    |                    |                      |                                               |         |
|                                                                                                        | No. cases/ controls          | 41/71         | 66/53              | 72/47              | 65/73              |                      | 244/244                                       |         |
|                                                                                                        | RR (95%CI)                   | Ref           | 3.36 (1.71 - 6.62) | 4.42 (2.25 - 8.71) | 1.97 (1.06 - 3.64) | <0.001               | 1.44 (0.97 - 2.12)                            | 0.07    |
|                                                                                                        | 2 years to ≤ 5 years         |               |                    |                    |                    |                      |                                               |         |
|                                                                                                        | No. cases/ controls          | 103/103       | 113/127            | 139/137            | 115/103            |                      | 470/470                                       |         |
|                                                                                                        | RR (95%CI)                   | Ref           | 0.83 (0.56 - 1.24) | 1.03 (0.70 - 1.54) | 1.13 (0.74 - 1.73) | 0.46                 | 1.06 (0.80 - 1.42)                            | 0.67    |
|                                                                                                        | >5 years                     |               |                    |                    |                    |                      |                                               |         |
|                                                                                                        | No. cases/ controls          | 153/150       | 138/145            | 137/137            | 151/147            |                      | 579/579                                       |         |
|                                                                                                        | RR (95%CI)                   | ref           | 1.02 (0.73 - 1.44) | 0.97 (0.69 - 1.37) | 0.98 (0.69 - 1.39) | 0.99                 | 1.01 (0.79 - 1.29)                            | 0.94    |
|                                                                                                        | >2 years                     |               |                    |                    |                    |                      |                                               |         |
|                                                                                                        | No. cases/ controls          | 256/253       | 251/272            | 276/274            | 266/250            |                      | 1049/1049                                     |         |
|                                                                                                        | RR (95%CI)                   | ref           | 0.92 (0.72 - 1.19) | 0.98 (0.76 - 1.27) | 1.05 (0.81 - 1.37) | 0.79                 | 1.03 (0.86 - 1.24)                            | 0.72    |
| Complete case analysis (including only participants with no missing data on any variable) <sup>f</sup> |                              |               |                    |                    |                    |                      |                                               |         |
|                                                                                                        | No. cases/ controls, Model 1 | 276/290       | 280/297            | 315/285            | 288/285            |                      | 1159/1157                                     |         |

|                                                                                 |                       |         |                           |                           |                           |             |                           |             |
|---------------------------------------------------------------------------------|-----------------------|---------|---------------------------|---------------------------|---------------------------|-------------|---------------------------|-------------|
|                                                                                 | RR (95%CI)            | ref     | 1 (0.79 - 1.28)           | 1.19 (0.93 - 1.51)        | 1.08 (0.84 - 1.38)        | 0.46        | 1.12 (0.95 - 1.34)        | 0.18        |
| Excluding participants with extreme resistin levels ( from 8.38 to 34.41 ng/mL) |                       |         |                           |                           |                           |             |                           |             |
|                                                                                 | No. cases/ controls   | 292/310 | 304/314                   | 336/307                   | 262/263                   |             | 1194/1194                 |             |
|                                                                                 | RR (95%CI)            | ref     | 1.06 (0.84 - 1.34)        | 1.19 (0.94 - 1.51)        | 1.08 (0.84 - 1.39)        | 0.51        | 1.10 (0.91 - 1.34)        | 0.32        |
| By fasting status <sup>c, d</sup>                                               |                       |         |                           |                           |                           |             |                           |             |
|                                                                                 | <=6 hours             |         |                           |                           |                           |             |                           |             |
|                                                                                 | No. cases/ controls   | 228/226 | 212/227                   | 249/247                   | 254/243                   |             | 943/943                   |             |
|                                                                                 | RR (95%CI)            | ref     | 1.00 (0.77 - 1.31)        | 1.04 (0.79 - 1.36)        | 1.12 (0.84 - 1.47)        | 0.85        | 1.04 (0.86 - 1.25)        | 0.70        |
|                                                                                 | >6 hours              |         |                           |                           |                           |             |                           |             |
|                                                                                 | No. cases/ controls   | 69/98   | 105/98                    | 99/74                     | 77/80                     |             | 350/350                   |             |
|                                                                                 | RR (95%CI)            | ref     | <b>1.76 (1.11 - 2.79)</b> | <b>2.09 (1.30 - 3.34)</b> | <b>1.47 (0.91 - 2.36)</b> | <b>0.02</b> | <b>1.45 (1.03 - 2.03)</b> | <b>0.03</b> |
| By colon cancer categorizing <sup>f</sup>                                       |                       |         |                           |                           |                           |             |                           |             |
|                                                                                 | Distal colon cancer   |         |                           |                           |                           |             |                           |             |
|                                                                                 | No. cases/ controls   | 86/92   | 109/107                   | 99/100                    | 108/103                   |             | 402/402                   |             |
|                                                                                 | RR (95%CI)            | ref     | 1.14 (0.74 - 1.75)        | 1.18 (0.75 - 1.85)        | 1.23 (0.80 - 1.9)         | 0.82        | 1.14 (0.85 - 1.54)        | 0.39        |
|                                                                                 | Proximal colon cancer |         |                           |                           |                           |             |                           |             |
|                                                                                 | No. cases/ controls   | 77/80   | 69/85                     | 100/87                    | 103/97                    |             | 349/349                   |             |
|                                                                                 | RR (95%CI)            | ref     | 0.95 (0.59 - 1.52)        | 1.24 (0.77 - 2.02)        | 1.2 (0.73 - 1.97)         | 0.65        | 1.24 (0.89 - 1.72)        | 0.20        |

a. P values for trend derived from models with the median resistin concentration within quartiles as a continuous variable.

b. Models with continuous log-transformed resistin concentrations by log 2.

c. Results were based on unconditional logistic regression models adjusted for age, sex (men, women with classifying by menopausal status, phase of the menstrual cycle at blood collection and use of oral contraceptives at blood collection; and hormone replacement therapy use in postmenopausal women), study center, time of the day at blood collection, and fasting status, smoking status, education, alcohol consumption, alcohol abstainers, physical activity index, energy intake, red meat, processed meat, dietary fiber, fruit intake, vegetable intake, dairy intake, fish and shellfish intake, BMI, and residuals of BMI-adjusted waist circumference.

d. BMI and residuals of BMI-adjusted waist circumference were not included in the model as a covariate.

e. Data for hsCRP were only available on 868 cases and 727 controls.

f. Results were based on conditional logistic regression models conditioned on matching factors (age, sex, study center, time of the day at blood collection, and fasting status; women were further matched by menopausal status, phase of the menstrual cycle and use of oral contraceptives at blood collection; postmenopausal women were matched by hormone replacement therapy use) and adjusted for smoking status, education, alcohol consumption, alcohol abstainers, physical activity index, energy intake, red meat, processed meat, dietary fiber, fruit intake, vegetable intake, dairy intake, fish and shellfish intake, body mass index (BMI), and residuals of BMI-adjusted waist circumference.

Table S3. Characteristics of the studies investigated the relationship between circulating resistin concentrations and risk of colorectal cancer

|   | Author, Year          | Study design | Country      | Blood sample | No. of participants         | Assay kit             | Assay manufacturer | Pre-diagnostic resistin | ORs/RRs (95%CI)<br><sup>a</sup> resistin levels were used as continuous variables;<br><sup>b</sup> log-transformed resistin levels                         | Covariates                                                                                                                                                                              |
|---|-----------------------|--------------|--------------|--------------|-----------------------------|-----------------------|--------------------|-------------------------|------------------------------------------------------------------------------------------------------------------------------------------------------------|-----------------------------------------------------------------------------------------------------------------------------------------------------------------------------------------|
| 1 | Mihajlovic M 2019     | Case-control | Serbia       | Plasma       | CRC 86/ 75 control          | ELISA                 | R&D Systems        | No                      | <sup>a</sup> <b>1.06 (1.01–1.10) P&lt; 0.05 Per 1 unit of Resistin (ng/mL)</b>                                                                             | age, gender, BMI, HDLC, and LDL-C                                                                                                                                                       |
| 2 | Joshi et al. 2014     | Case-control | South Korea  | Serum        | CRC 100/ 100 control        | ELISA                 | Adipogen           | No                      | <b>Low (&lt;median): Ref</b><br><b>High (≥median): 5.44 (2.97-9.97) P&lt; 0.001. Median not shown</b>                                                      | Age, sex-matched odds ratio                                                                                                                                                             |
| 3 | Danese et al., 2012   | Case-control | Italy        | Serum        | CRC 40/ 40 control          | ELISA                 | Mediagnost         | No                      | <sup>ab</sup> <b>1.33 (1.03-1.72) per SD log resistin, P = 0.020</b>                                                                                       | Age, sex, BMI, and lifestyle parameters (smoking status, alcohol consumption, physical activity, family history of CRC and for women menopausal status and hormone replacement therapy) |
| 4 | Nakajima et al., 2010 | Case-control | Japan        | Plasma       | CRC 115/115 control         | ELISA                 | BioVendor          | No                      | <sup>ab</sup> <b>2.07 (1.05–4.06), p=0.03) per SD log resistin,</b>                                                                                        | Used age-, sex, and BMI-matched control.                                                                                                                                                |
| 5 | Otake et al., 2010    | Case-control | Japan        | Plasma       | CRC 51/26 controls          | ELISA                 | BioVendor          | No                      | Low (< 42 ng/mL): Ref<br>High (as ≥ 42 ng/mL), early cancer: 0.980 (0.32-2.81) p=0.969 ;<br>High (as ≥ 42 ng/mL), advanced cancer: 0.67 (0.19-2.33) p=0.53 | No covariate included.                                                                                                                                                                  |
| 6 | Ho GY et al., 2012    | Case-cohort  | USA (WHI-OS) | Plasma       | CRC 456/ 834 healthy people | Multiplex immunoassay | Millipore          | Yes                     | Q1 (<10ng/mL): Ref<br>Q2 (10.0–12.5): 0.84 (0.57–1.24)<br>Q3 (12.6–15.7): 0.90 (0.62–1.32)<br>Q4 (≥15.8): 1.04 (0.72–1.50)<br>P=0.73                       | Age, race, smoking, history of colonoscopy, waist circumference, and estrogen level                                                                                                     |
